# Supplementary material
Source: publisher site journal article supplement (https://www.dovepress.com/article/374293)

# **ICAM1-targeting theranostic nanoparticles for magnetic resonance imaging and therapy of triple-negative breast cancer**

**Supplementary materials:**

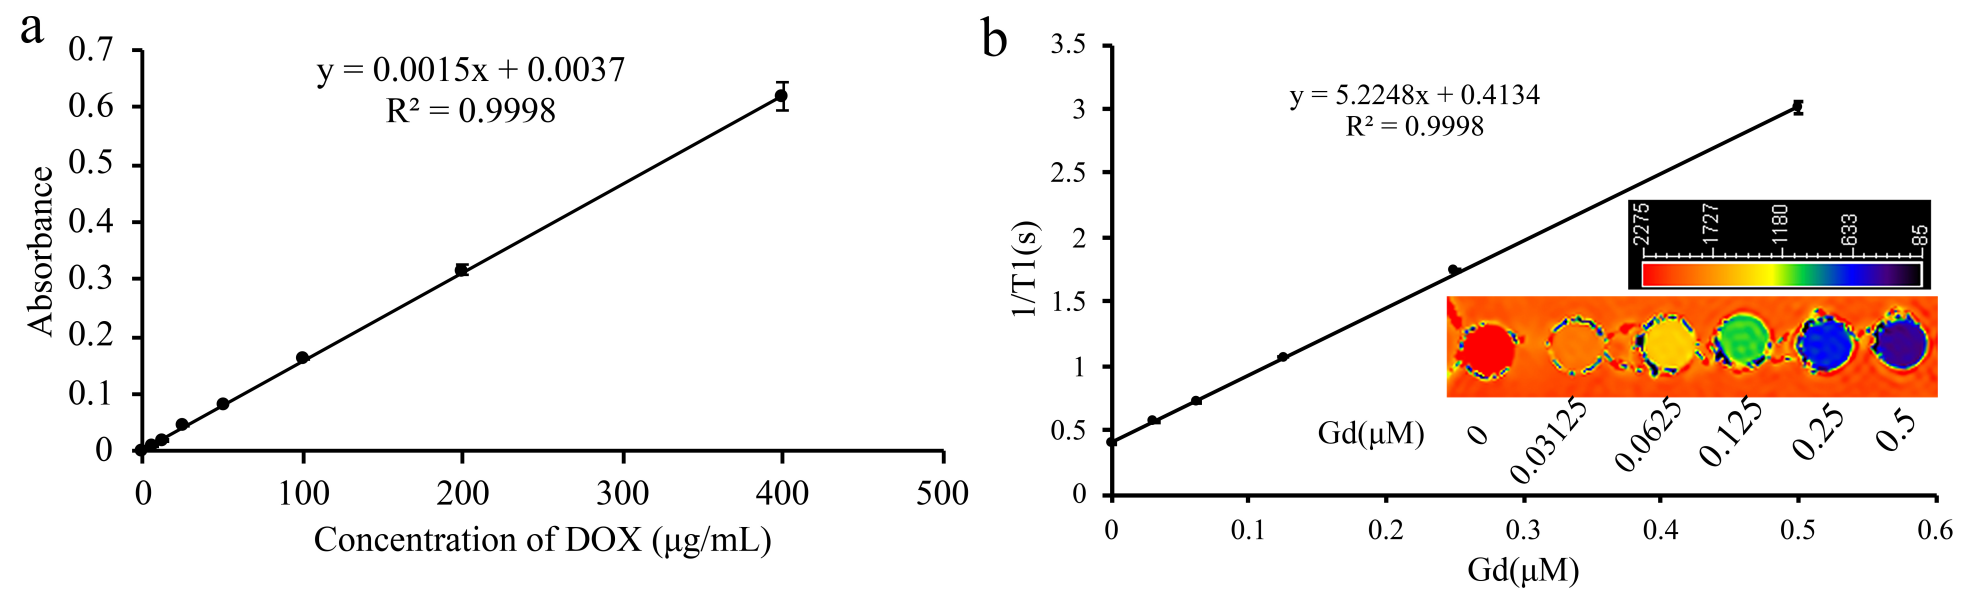

**Figure S1** Calibrations of DOX (a) and Gd (b)

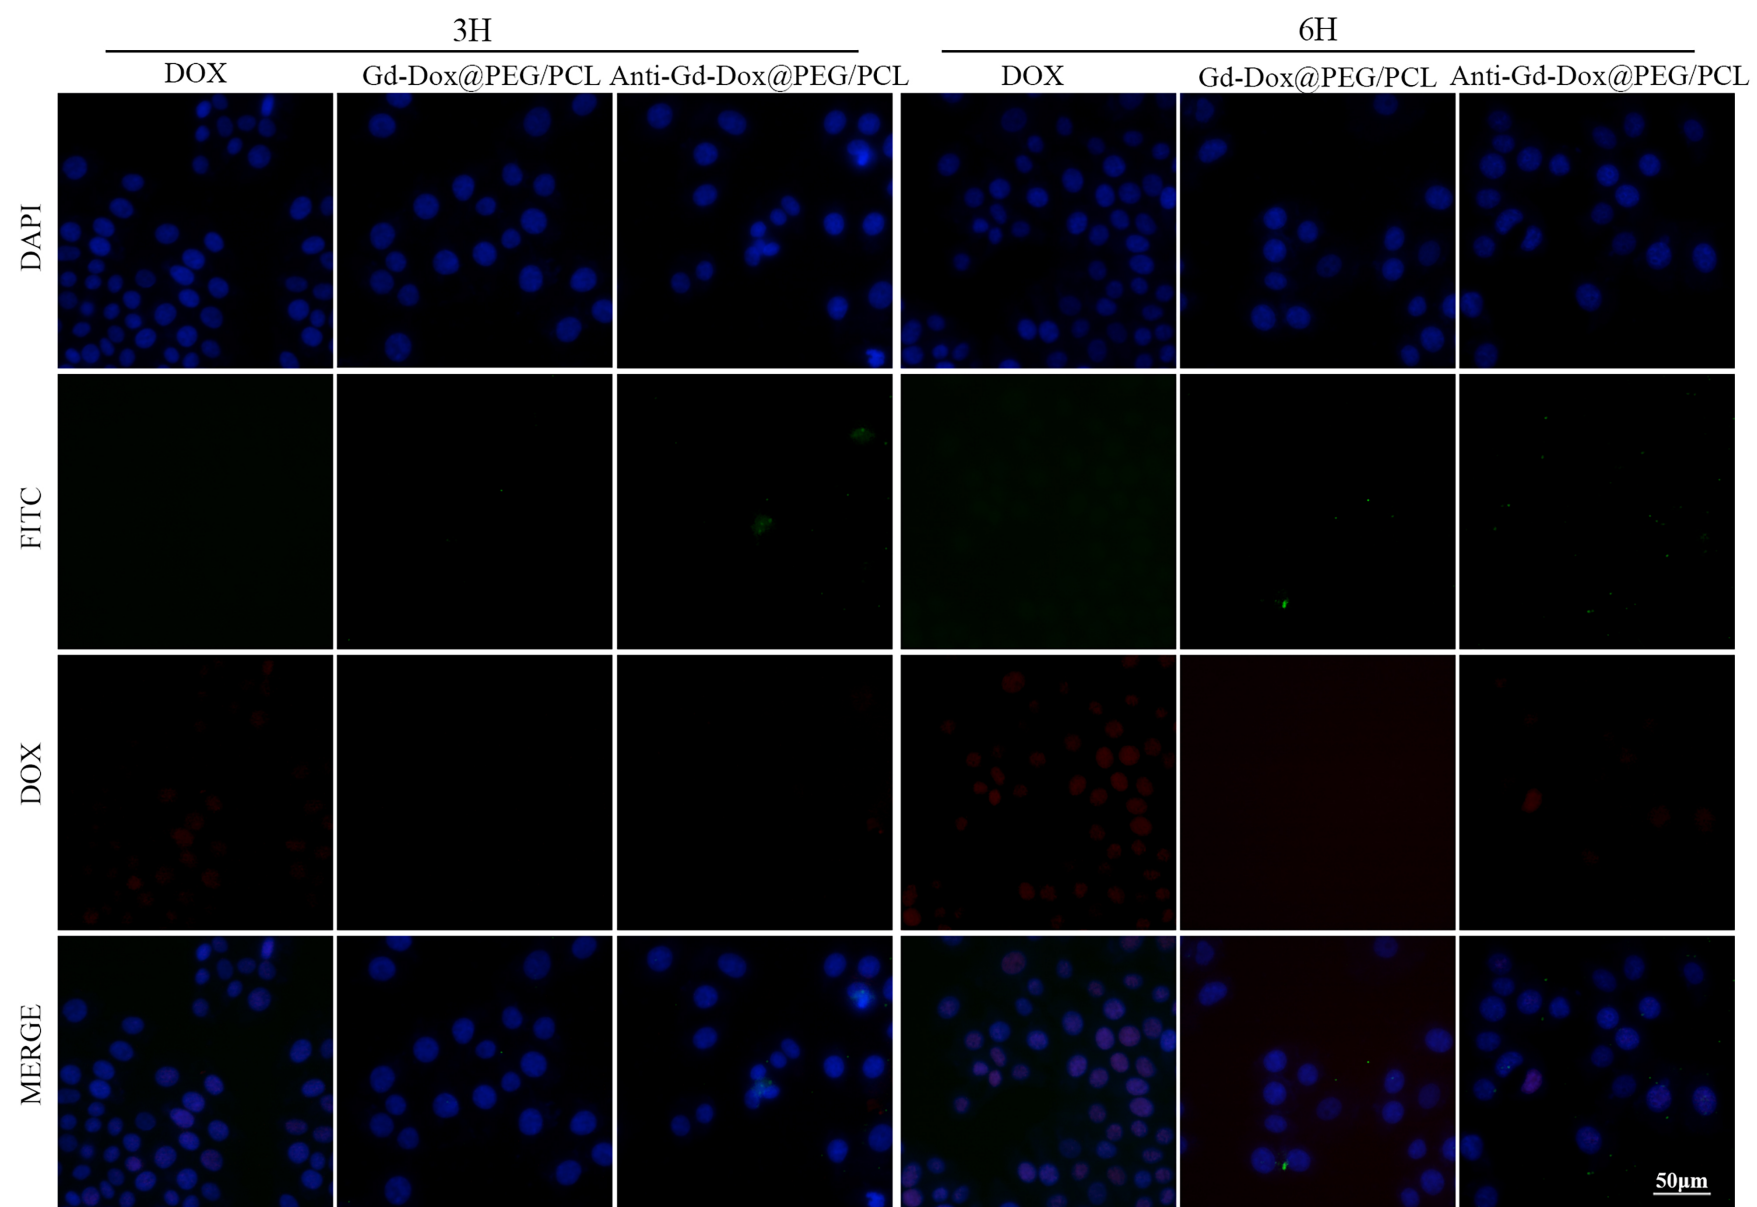

**Figure S2** Fluorescence microscope images of MCF7 cells treated with Anti-Gd-Dox@PEG/PCL-FITC, Gd-Dox@PEG/PCL-FITC and DOX for 3 h and 6 h, respectively

**Figure S3** Routine blood parameters and serum biochemical parameters. \* $p < 0.05$ , \*\* $p < 0.01$ , \*\*\* $p < 0.001$ , \*\*\*\* $p < 0.0001$ , in comparison with untreated control. All comparisons were conducted via ANOVA except for CR, Lymph#, Mon#, Gran#, Lymph%, Mon%, Gran%, MCHC, RDW, and PCT, which were not normal distribution and compared with non-parametric test (Kruskal-Wallis test).

Abbreviations in figure S3:

| Abbreviations | Meanings                                                      |
|---------------|---------------------------------------------------------------|
| ALT           | alanine aminotransferase                                      |
| AST           | aspartate aminotransferase                                    |
| BUN           | blood urea nitrogen                                           |
| CR            | creatinine                                                    |
| Gran#         | granulocyte count                                             |
| Gran%         | percentage of granulocyte                                     |
| HCT           | hematocrit                                                    |
| HGB           | hemoglobin                                                    |
| Lymph#        | lymphocyte count                                              |
| Lymph%        | percentage of lymphocyte                                      |
| MCH           | mean corpuscular hemoglobin concentration                     |
| MCHC          | mean corpuscular hemoglobin concentration                     |
| MCV           | mean red blood cell volume                                    |
| Mon#          | monocyte count                                                |
| Mon%          | percentage of monocyte                                        |
| MPV           | mean platelet volume                                          |
| PCT           | platelet hematocrit                                           |
| PDW           | platelet distribution width                                   |
| PLT           | platelet count                                                |
| RBC           | red blood cell count                                          |
| RDW           | coefficient of variation of red blood cell distribution width |
| TBIL          | total bilirubin                                               |
| UA            | urea                                                          |
| WBC           | white blood cell count                                        |

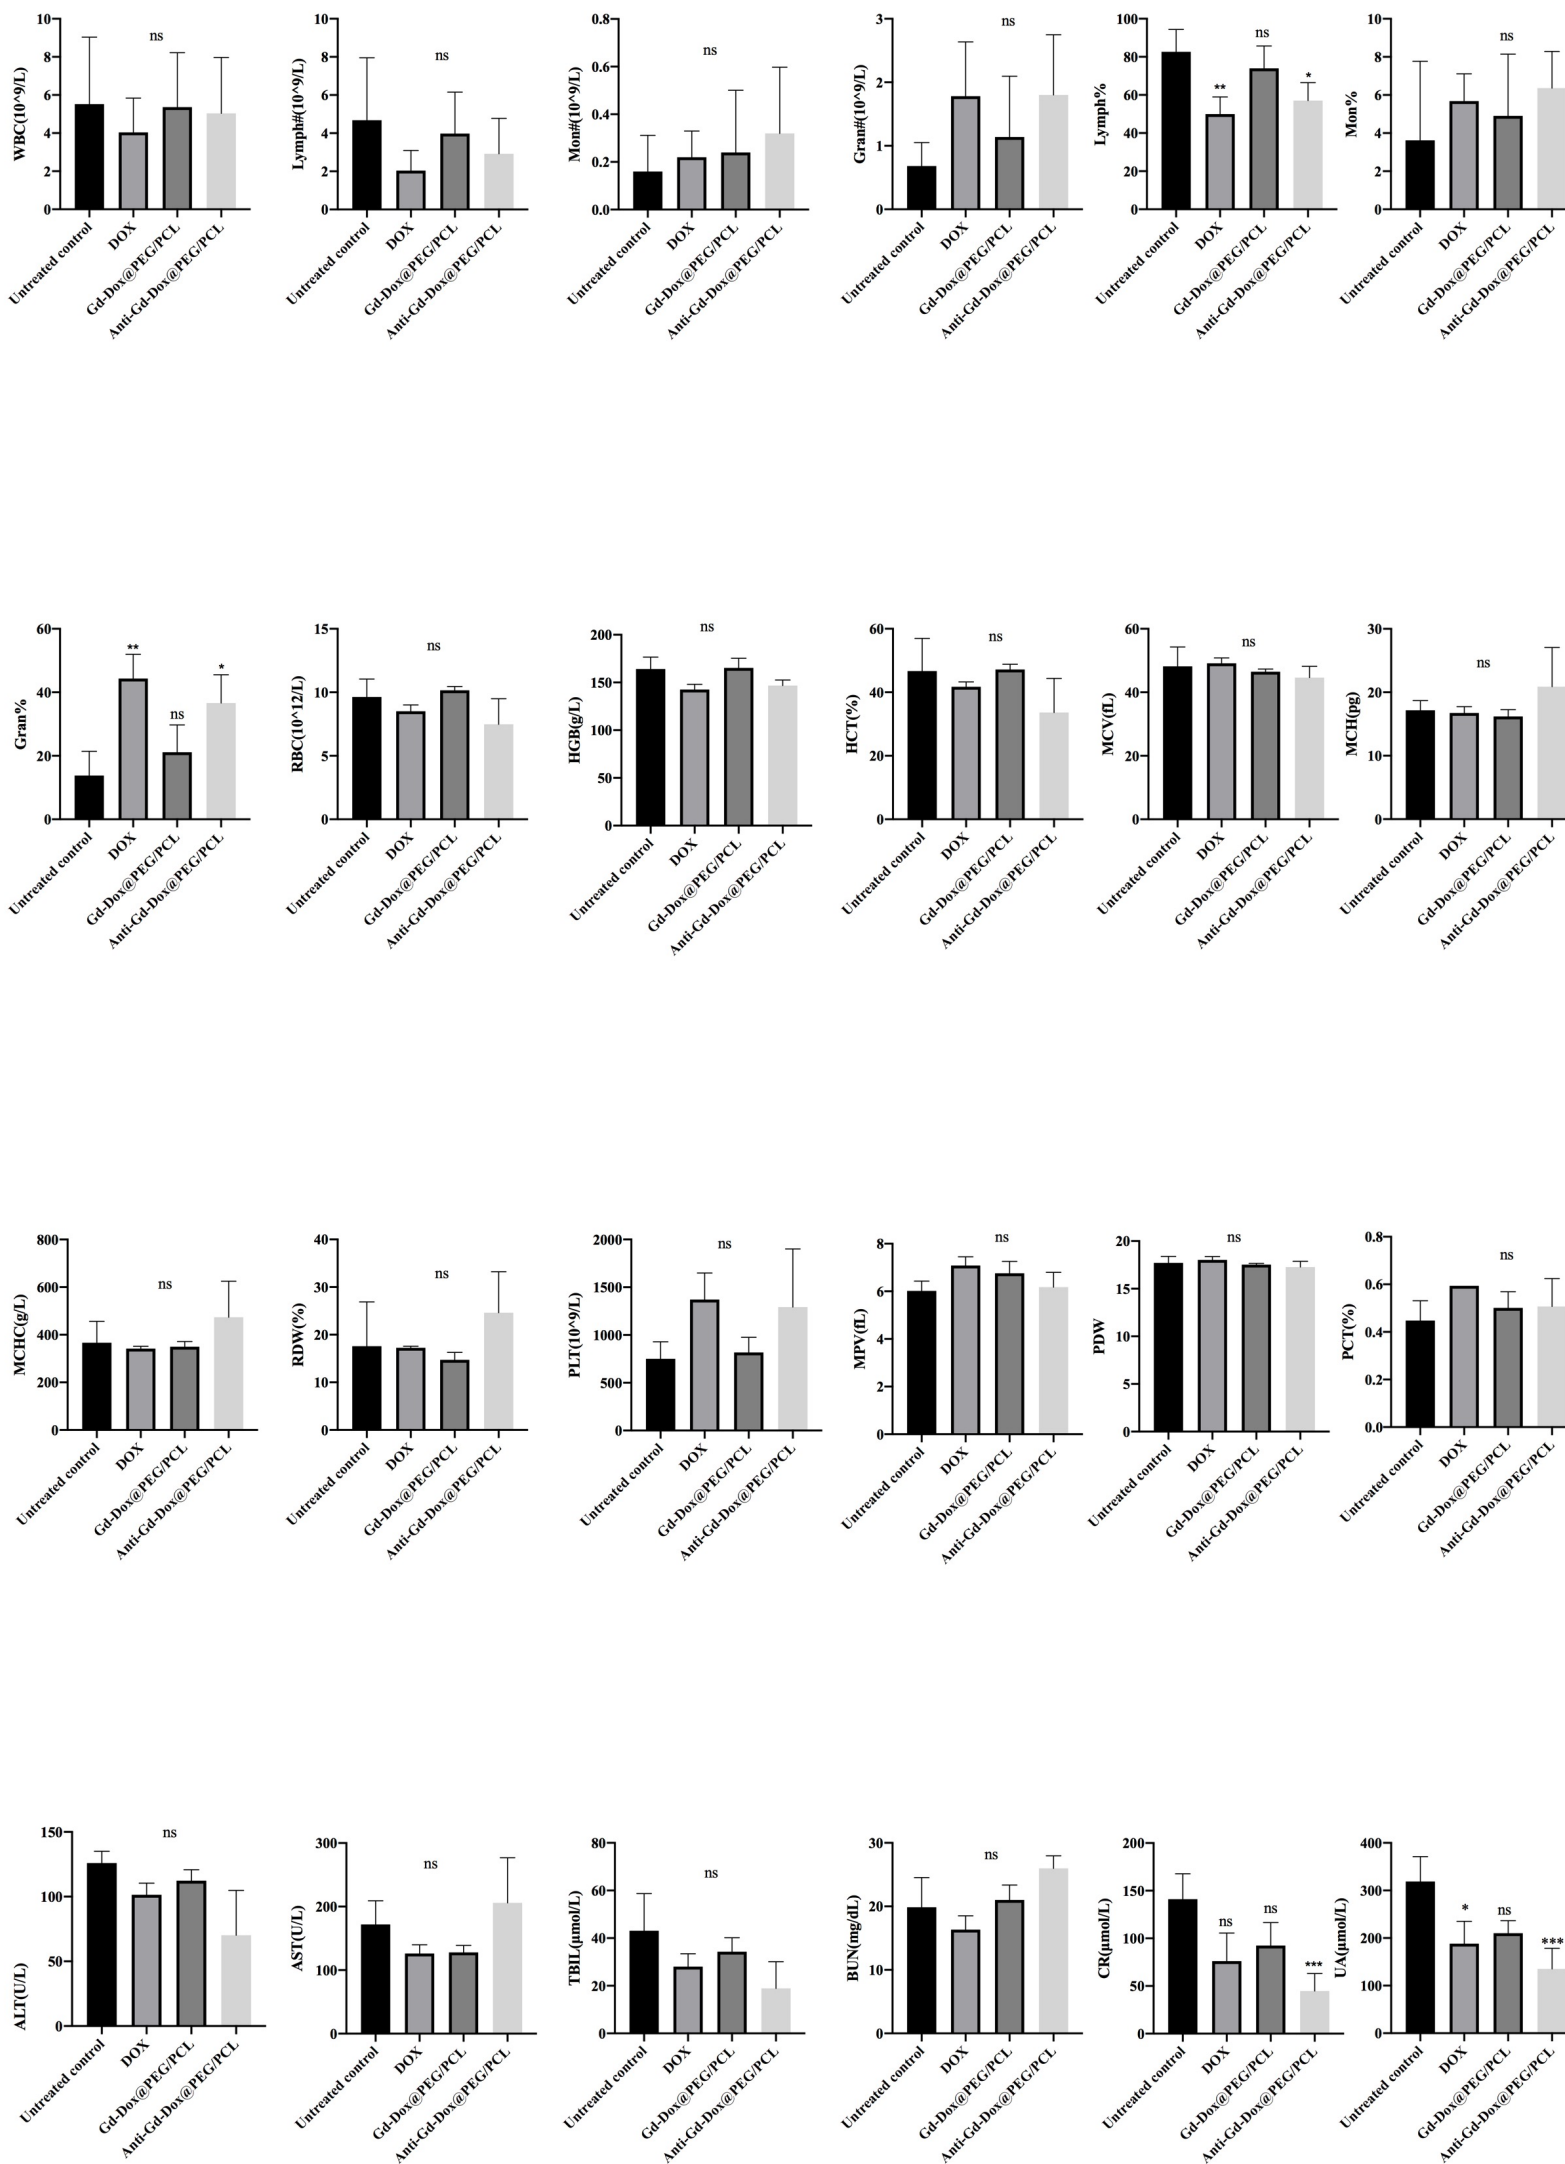

Supplement: Supplementary file 1 [file get_supplementary_file.php]
